# Supplementary material for: Hypoxic metabolism in human hematopoietic stem cells
Source: PubMed Central journal article supplement (PMC4517642; doi:10.1186/s13578-015-0020-3), 2015-07-17

# sFigure 1

## A Quantification of HSC frequency in Low MP and High MP cells

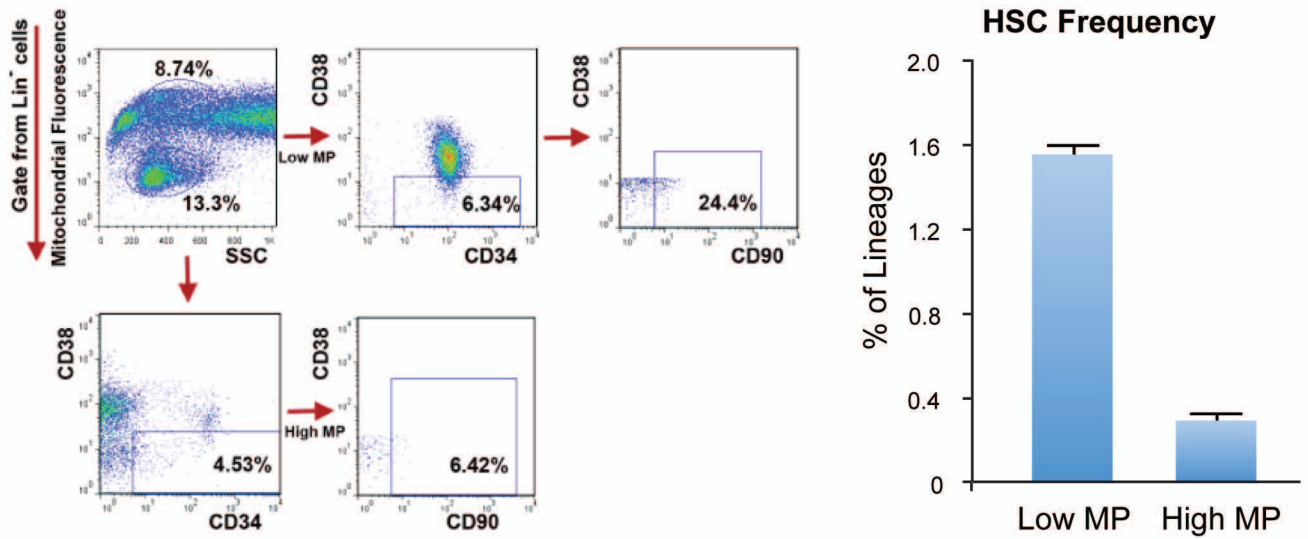

## B Human HPSCs clusters into Low MP and High MP cells

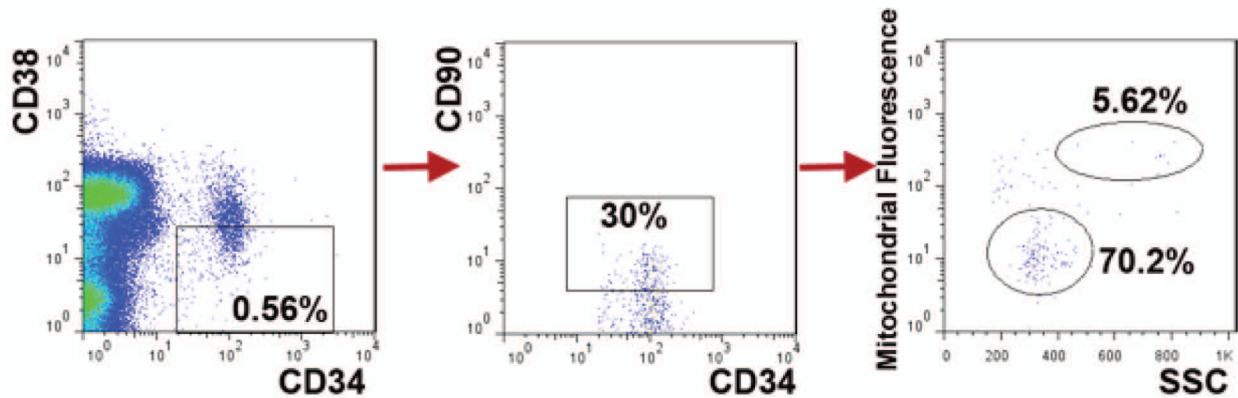

## C CD19 expression

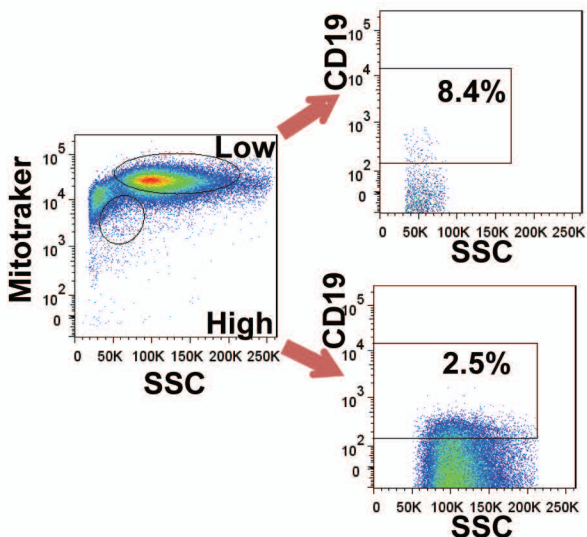

## D Mac-1 expression

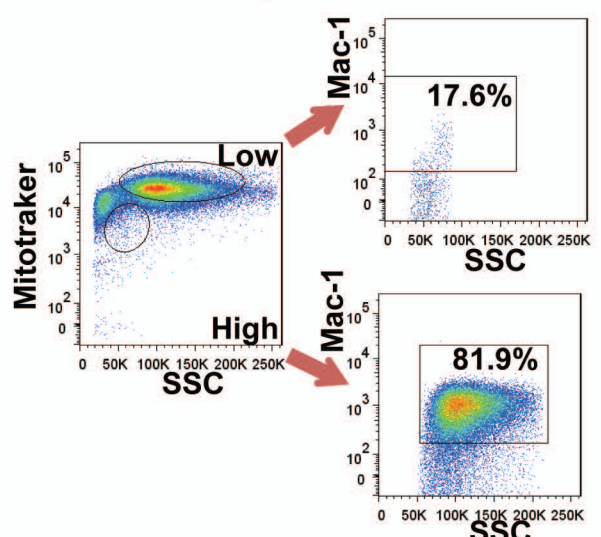

Supplement: 13578_2015_20_MOESM1_ESM.pdf [file 13578_2015_20_MOESM1_ESM.pdf]
