# Supplementary material for: Hypoxic metabolism in human hematopoietic stem cells
Source: PubMed Central journal article supplement (PMC4517642; doi:10.1186/s13578-015-0020-3), 2015-07-17

# sFigure 2

## A Survival of Low MP Cells at Hypoxia

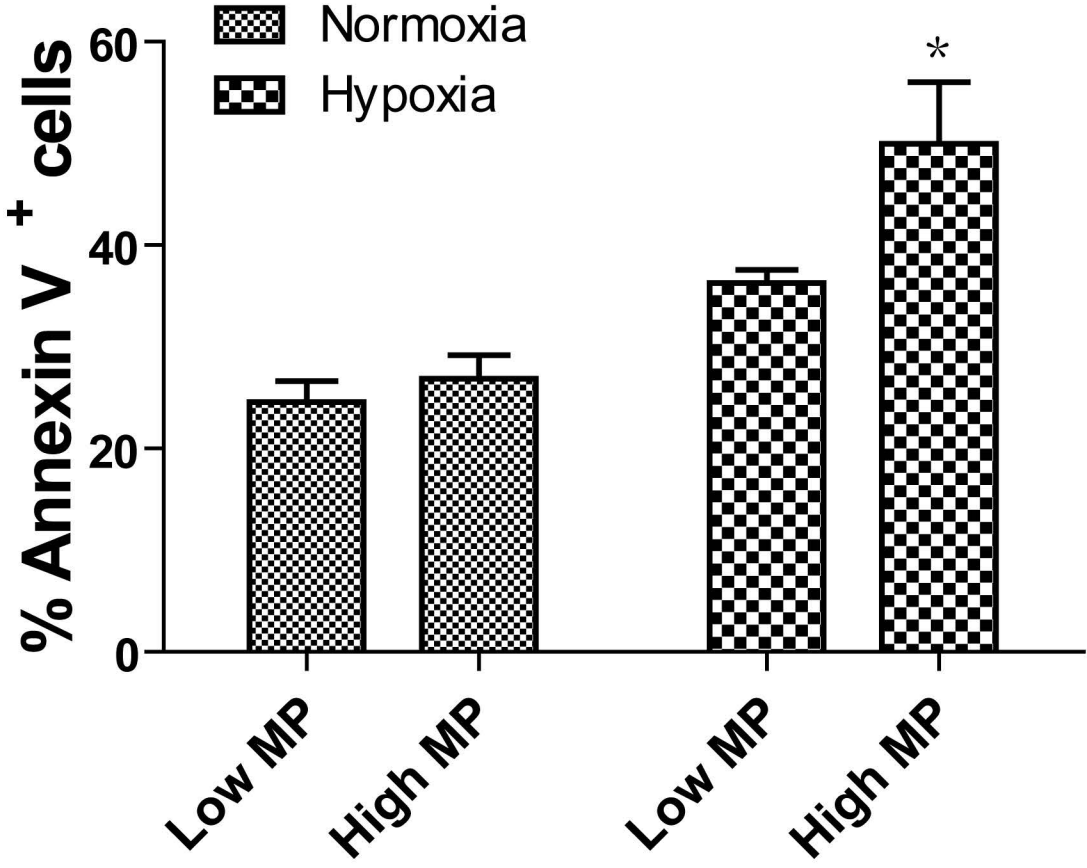

## B Repopulation of Low/High MP Cells

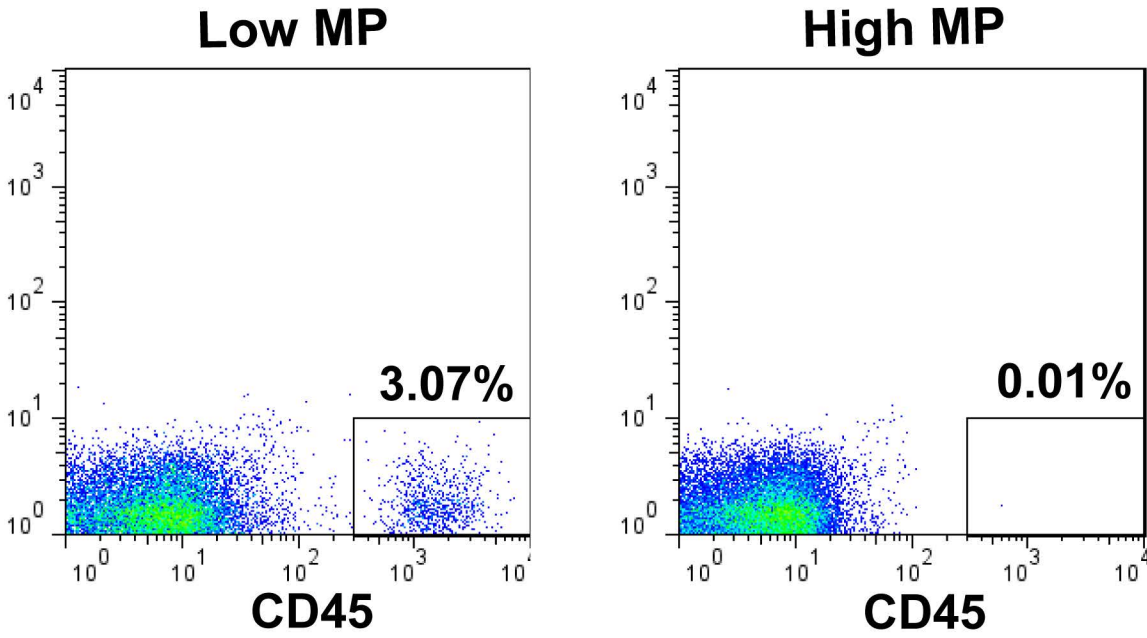

Supplement: 13578_2015_20_MOESM2_ESM.pdf [file 13578_2015_20_MOESM2_ESM.pdf]
