# Supplementary material for: Hypoxic metabolism in human hematopoietic stem cells
Source: PubMed Central journal article supplement (PMC4517642; doi:10.1186/s13578-015-0020-3), 2015-07-17

sFigure 3 Gating strategy for Meis1 and Hif-1 $\alpha$  intracellular staining in human MPB Cells (Related to Figure 4A, 4D, and 4G)

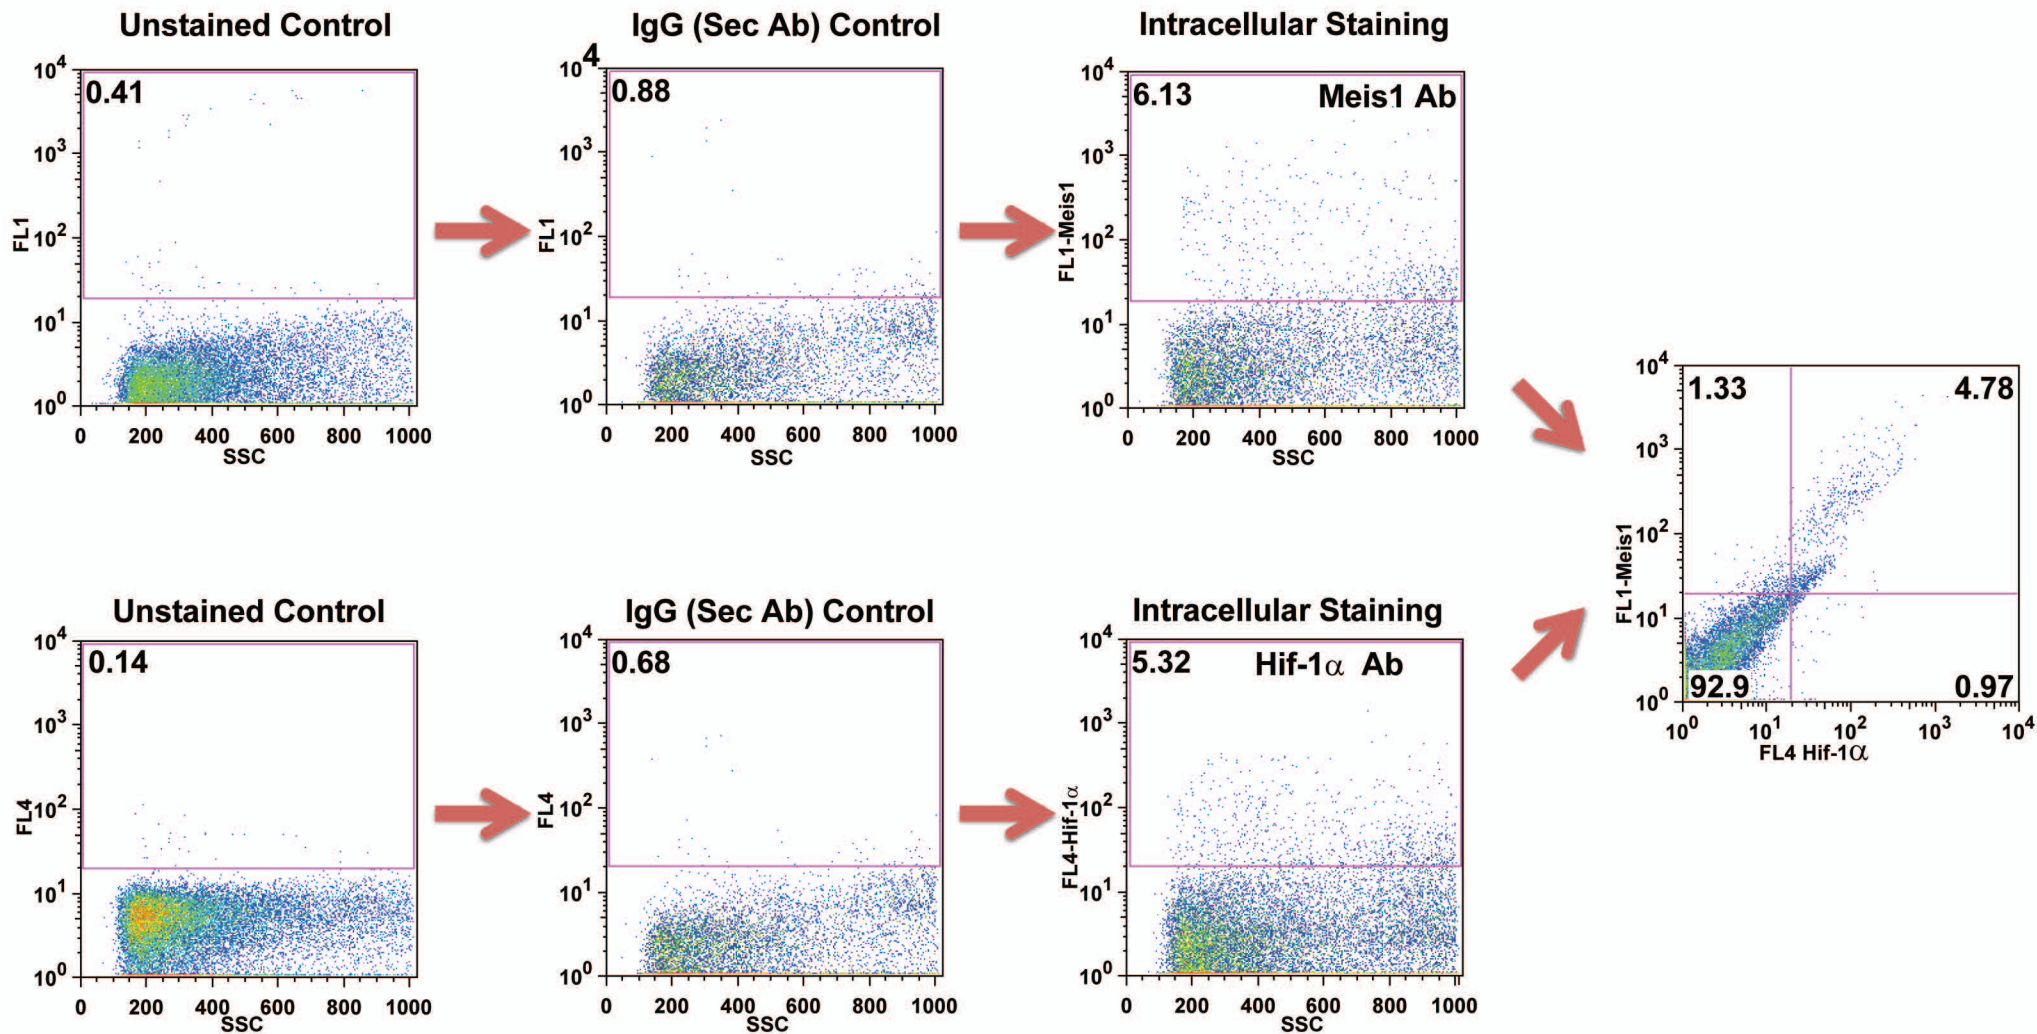

Supplement: 13578_2015_20_MOESM3_ESM.pdf [file 13578_2015_20_MOESM3_ESM.pdf]
