# Supplementary material for: Hypoxic metabolism in human hematopoietic stem cells
Source: PubMed Central journal article supplement (PMC4517642; doi:10.1186/s13578-015-0020-3), 2015-07-17

**sFigure 4 Meis1 and Hif-1 $\alpha$  intracellular staining in human HPSCs (Lin<sup>-</sup> CD34<sup>+</sup>)**  
(Related to Figure 4B and 4E)

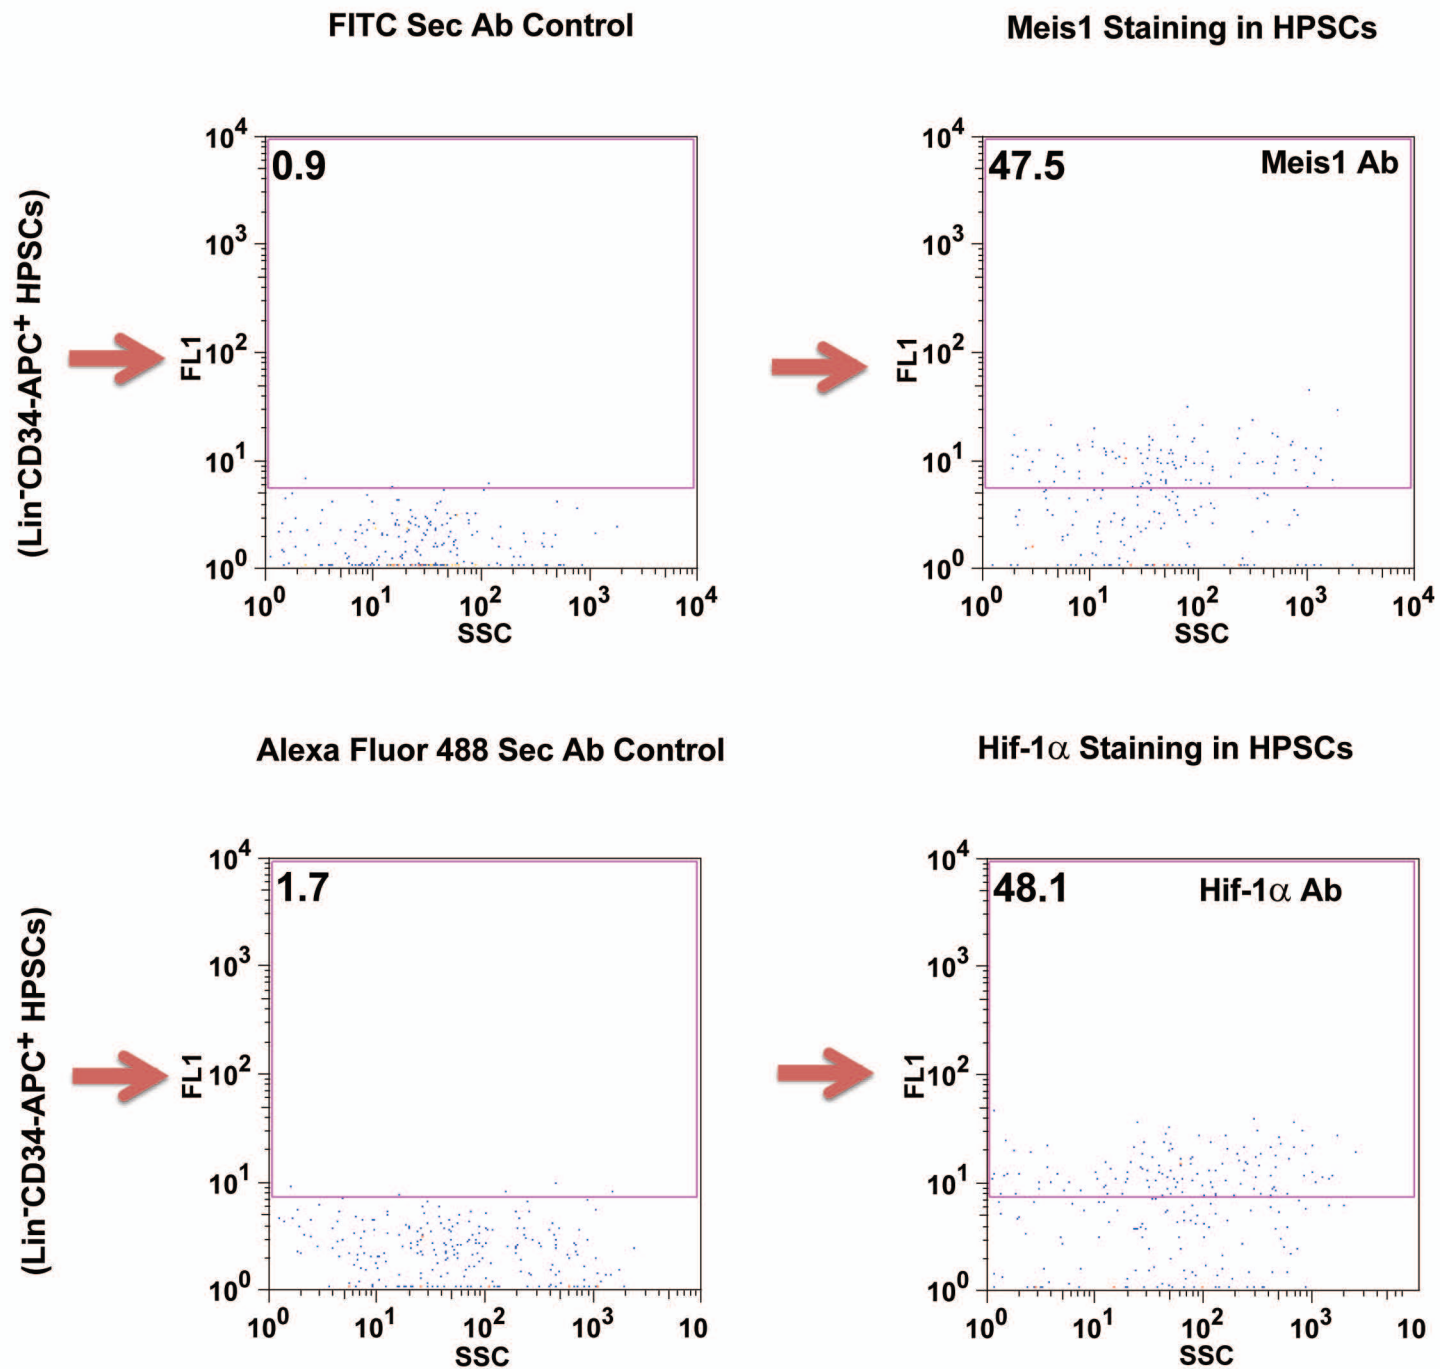

Supplement: 13578_2015_20_MOESM4_ESM.pdf [file 13578_2015_20_MOESM4_ESM.pdf]
