# Supplementary material for: Hypoxic metabolism in human hematopoietic stem cells
Source: PubMed Central journal article supplement (PMC4517642; doi:10.1186/s13578-015-0020-3), 2015-07-17

Figure 5 Knockdown efficiency of Meis1 by siRNA

Control siRNA

Meis1 siRNA

Meis1

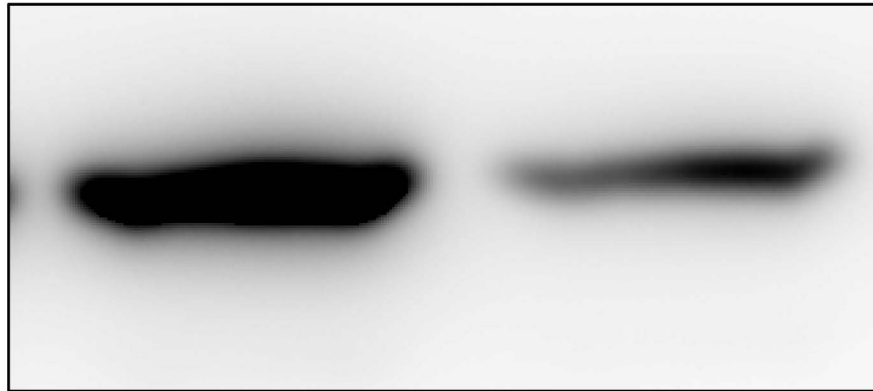

GAPDH

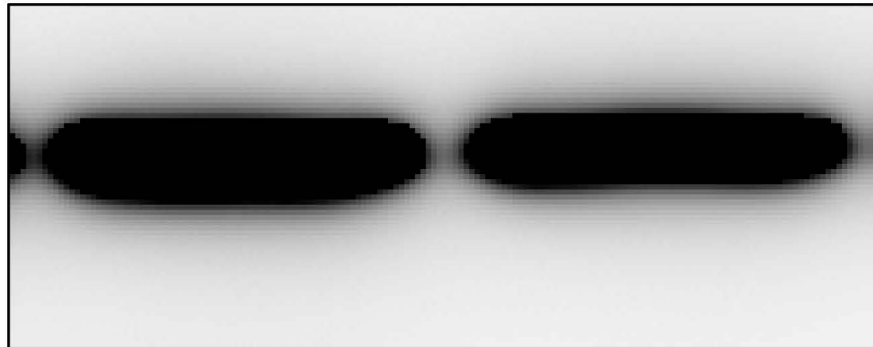

Supplement: 13578_2015_20_MOESM5_ESM.pdf [file 13578_2015_20_MOESM5_ESM.pdf]
