# Supplementary material for: Hypoxic metabolism in human hematopoietic stem cells
Source: PubMed Central journal article supplement (PMC4517642; doi:10.1186/s13578-015-0020-3), 2015-07-17

# sFigure 6 Expression of Meis1 and HoxA9 deletion mutants

**A**

*HoxA9*

*HoxaΔMID*

**HoxA9**

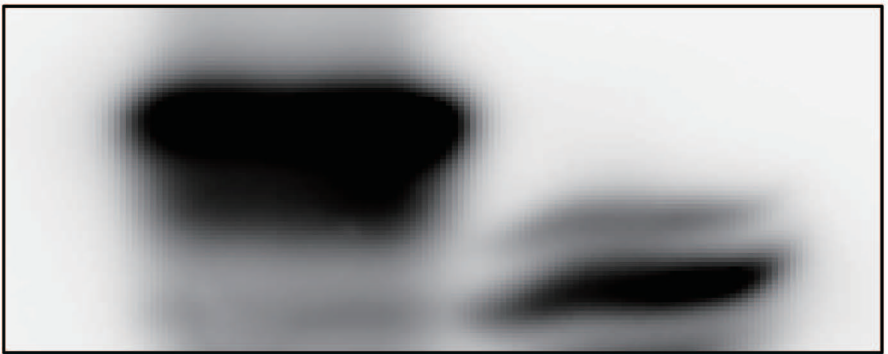

**B**

*Meis1*

*Meis1ΔPIM*

**Meis1**

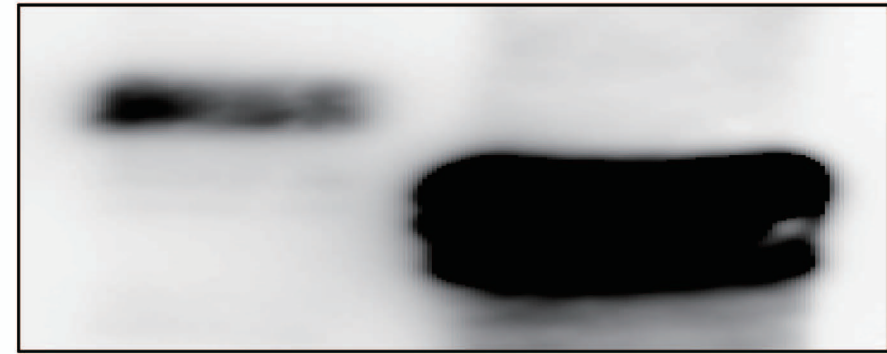

Supplement: 13578_2015_20_MOESM6_ESM.pdf [file 13578_2015_20_MOESM6_ESM.pdf]
